# Supplementary material
Source: PubMed Central journal article supplement (PMC6428413)
Supplement: NIHMS1017774-supplement-1.pdf [file NIHMS1017774-supplement-1.pdf]

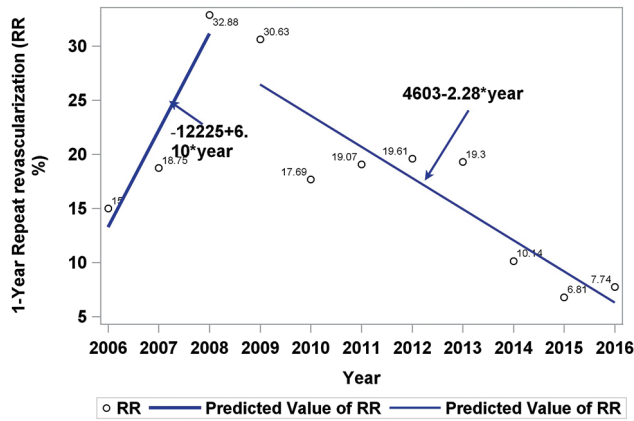

**SUPPLEMENTAL FIGURE S1.** Piecewise regression: a time trend of 1-year repeat revascularization (RR).

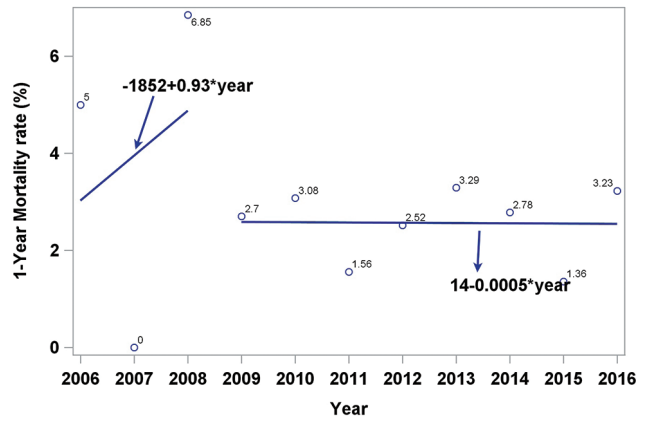

**SUPPLEMENTAL FIGURE S2.** Piecewise regression: a time trend of 1-year all-cause mortality.

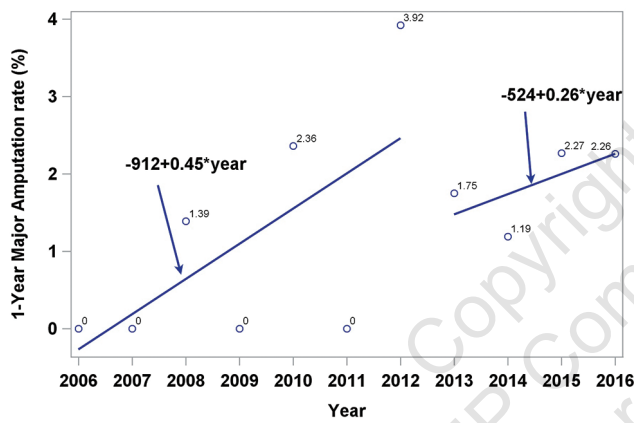

**SUPPLEMENTAL FIGURE S3.** Piecewise regression: a time trend of 1-year major amputation.

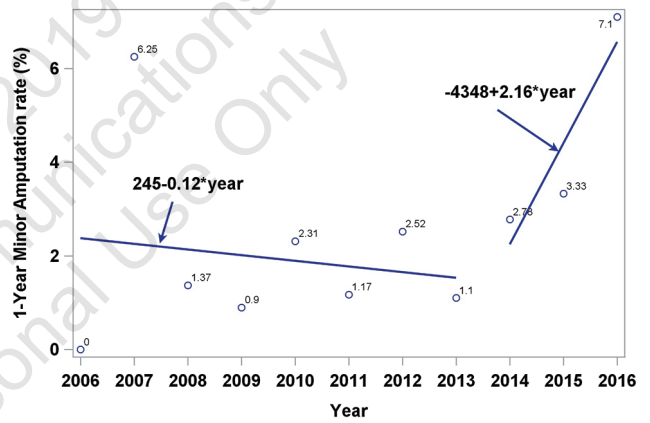

**SUPPLEMENTAL FIGURE S4.** Piecewise regression: a time trend of 1-year minor amputation.
